# Supplementary material for: Potential Defence Mechanisms Triggered by Monosodium Glutamate Sub-Chronic Consumption in Two-Year-Old Wistar Rats
Source: MDPI journal article supplement (doi:10.3390/nu15204436), 2023-10-19
Supplement: s1 [file s1]

# Potential Defence Mechanisms Triggered by Monosodium Glutamate Sub-Chronic Consumption in Two-Year-Old Wistar Rats

Octavia-Laura Moldovan <sup>1,\*</sup>, Camil-Eugen Vari <sup>2</sup>, Amelia Tero-Vescan <sup>3</sup>, Ovidiu Simion Cotoi <sup>4,5</sup>, Iuliu Gabriel Cocuz <sup>4,5</sup>, Flaviu Alexandru Tabaran <sup>6</sup>, Romelia Pop <sup>6</sup>, Ibolya Fülöp <sup>7</sup>, Rafael Florin Chis <sup>8</sup>, Ioana-Andreea Lungu <sup>1</sup> and Aura Rusu <sup>9</sup>

<sup>1</sup> Medicine and Pharmacy Doctoral School, George Emil Palade University of Medicine, Pharmacy, Science, and Technology of Targu Mures, 540142, Targu Mures, Romania;

<sup>2</sup> Pharmacology and Clinical Pharmacy Department, Faculty of Pharmacy, George Emil Palade University of Medicine, Pharmacy, Science, and Technology of Targu Mures, 540142 Targu Mures, Romania;

<sup>3</sup> Medical Chemistry and Biochemistry Department, Faculty of Medicine in English, George Emil Palade University of Medicine, Pharmacy, Science, and Technology of Targu Mures, 540142 Targu Mures, Romania;

<sup>4</sup> Pathophysiology Department, Faculty of Medicine, George Emil Palade University of Medicine, Pharmacy, Science, and Technology of Targu Mures, 540142 Targu Mures, Romania;

<sup>5</sup> Pathology Department, Mures Clinical County Hospital, 540011, Targu Mures, Romania

<sup>6</sup> Department of Pathology, Faculty of Veterinary Medicine, University of Agricultural Sciences and Veterinary Medicine of Cluj-Napoca, Calea Manastur, 400372 Cluj-Napoca, Romania.)

<sup>7</sup> Toxicology and Biopharmacy Department, Faculty of Pharmacy, George Emil Palade University of Medicine, Pharmacy, Science, and Technology of Targu Mures, 540142 Targu Mures, Romania;

<sup>8</sup> George Emil Palade University of Medicine, Pharmacy, Science, and Technology of Targu Mures, 540142, Targu Mures, Romania;

<sup>9</sup> Pharmaceutical and Therapeutic Chemistry Department, Faculty of Pharmacy, George Emil Palade University of Medicine, Pharmacy, Science, and Technology of Targu Mures, 540142 Targu Mures, Romania

\* Correspondence: octavia.moldovan@umfst.ro (O.-L.M.)

## SUPPLEMENTARY MATERIALS

**Table S1.** AST and ALT values measured after three months of daily MSG administration in two-years-old rats (bw – body weight).

| Group   | No. of subjects/<br>group | MSG dose      | AST (U/l)<br>(Mean ± standard<br>deviation) | ALT (U/l)<br>(Mean ± standard<br>deviation) |
|---------|---------------------------|---------------|---------------------------------------------|---------------------------------------------|
| Control | 12                        | Non-consumer  | 148 ± 63.3                                  | 47.5 ± 12.9                                 |
| 1       | 10                        | 185 mg/kg bw  | 115 ± 55.3                                  | 50.2 ± 18.2                                 |
| 2       | 9                         | 1500 mg/kg bw | 135 ± 46.6                                  | 47.1 ± 13                                   |
| 3       | 7                         | 3000 mg/kg bw | 119 ± 113                                   | *62.1 ± 21.2                                |
| 4       | 12                        | 6000 mg/kg bw | 120 ± 40.9                                  | *41.9 ± 10.3                                |

Values represent the mean ± SD. One-way ANOVA, post hoc Dunnett's, and Tukey's tests were performed ( $p \leq 0.05$ ). Statistical differences were found between groups 3 and 4 for the ALT enzyme (statistical differences being marked with \*).

**Table S2.** ALP values measured after three months of daily MSG administration in two-year-old rats (bw – body weight).

| Group   | No. of subjects/<br>group | MSG dose      | ALP (U/l)<br>(Mean ± standard deviation) |
|---------|---------------------------|---------------|------------------------------------------|
| Control | 12                        | Non-consumer  | 57.7 ± 28.2                              |
| 1       | 10                        | 185 mg/kg bw  | *65.7 ± 19.6                             |
| 2       | 9                         | 1500 mg/kg bw | 39.8 ± 18.8                              |
| 3       | 7                         | 3000 mg/kg bw | 51.6 ± 18.9                              |
| 4       | 12                        | 6000 mg/kg bw | *26.5 ± 8.68                             |

Values represent the mean ± SD. One-way ANOVA, post hoc Dunnett's, and Tukey's tests were performed ( $p \leq 0.05$ ). Statistical differences exist between group 4 and the Control group and between group 1 and group 4 (statistical differences being marked with \*).

**Table S3.** Direct bilirubin (DB) and total bilirubin (TB) values measured after three months of daily MSG administration in two-year-old rats (bw – body weight).

| Group   | No. of subjects/<br>group | MSG dose      | DB (mg/dl)<br>(Mean ± standard deviation) | TB (mg/dl)<br>(Mean ± standard deviation) |
|---------|---------------------------|---------------|-------------------------------------------|-------------------------------------------|
| Control | 12                        | Non-consumer  | 0.0592 ± 0.0358                           | 0.0717 ± 0.0369                           |
| 1       | 10                        | 185 mg/kg bw  | 0.058 ± 0.0336                            | 0.067 ± 0.0424                            |
| 2       | 9                         | 1500 mg/kg bw | 0.0775 ± 0.0139                           | 0.0878 ± 0.0393                           |
| 3       | 7                         | 3000 mg/kg bw | 0.0625 ± 0.0191                           | 0.0863 ± 0.025                            |
| 4       | 12                        | 6000 mg/kg bw | 0.055 ± 0.0109                            | 0.0808 ± 0.0281                           |

Values represent the mean ± SD. One-way ANOVA, post hoc Dunnett's, and Tukey's tests were performed ( $p \leq 0.05$ ).

**Table S4.** Total cholesterol (CHOL) values measured after three months of daily MSG administration in two-year-old rats (bw – body weight).

| Group   | No. of subjects/<br>group | MSG dose      | CHOL (mg/dl)<br>(Mean ± standard deviation) |
|---------|---------------------------|---------------|---------------------------------------------|
| Control | 12                        | Non-consumer  | 143 ± 91                                    |
| 1       | 10                        | 185 mg/kg bw  | 131 ± 48.9                                  |
| 2       | 9                         | 1500 mg/kg bw | 146 ± 74                                    |
| 3       | 7                         | 3000 mg/kg bw | 116 ± 33.2                                  |
| 4       | 12                        | 6000 mg/kg bw | 154 ± 71                                    |

Values represent the mean ± SD. One-way ANOVA, post hoc Dunnett's, and Tukey's tests were performed ( $p \leq 0.05$ ).

**Table S5.** Triglyceride (TG) values measured after three months of daily MSG administration in two-year-old rats (bw – body weight).

| Group   | No. of subjects/<br>group | MSG dose      | TG (mg/dl)<br>(Mean ± standard deviation) |
|---------|---------------------------|---------------|-------------------------------------------|
| Control | 12                        | Non-consumer  | 181 ± 166                                 |
| 1       | 10                        | 185 mg/kg bw  | 127 ± 39.3                                |
| 2       | 9                         | 1500 mg/kg bw | 143 ± 55.5                                |
| 3       | 7                         | 3000 mg/kg bw | 155 ± 125                                 |
| 4       | 12                        | 6000 mg/kg bw | 253 ± 141                                 |

Values represent the mean ± SD. One-way ANOVA, post hoc Dunnett's, and Tukey's tests were performed ( $p \leq 0.05$ ).

**Table S6.** Creatinine (CR) values measured after three months of daily MSG administration in two-years-old rats (bw – body weight).

| Group   | No. of subjects/<br>group | MSG dose      | CR (mg/dl)<br>(Mean $\pm$ standard deviation) |
|---------|---------------------------|---------------|-----------------------------------------------|
| Control | 12                        | Non-consumer  | 0.346 $\pm$ 0.128                             |
| 1       | 10                        | 185 mg/kg bw  | 0.36 $\pm$ 0.13                               |
| 2       | 9                         | 1500 mg/kg bw | 0.399 $\pm$ 0.121                             |
| 3       | 7                         | 3000 mg/kg bw | 0.379 $\pm$ 0.0976                            |
| 4       | 12                        | 6000 mg/kg bw | *0.485 $\pm$ 0.146                            |

Values represent the mean  $\pm$  SD. One-way ANOVA, post hoc Dunnett's, and Tukey's tests were performed ( $p \leq 0.05$ ). Statistical difference was observed between the Control group and group 4 (statistical differences being marked with \*).

**Table S7.** Urea (UR) values measured after three months of daily MSG administration in two-year-old rats (bw – body weight).

| Group   | No. of subjects/<br>group | MSG dose      | UR (mg/dl)<br>(Mean $\pm$ standard deviation) |
|---------|---------------------------|---------------|-----------------------------------------------|
| Control | 12                        | Non-consumer  | 44.7 $\pm$ 15.4                               |
| 1       | 10                        | 185 mg/kg bw  | 42.9 $\pm$ 7.88                               |
| 2       | 9                         | 1500 mg/kg bw | 38.7 $\pm$ 6.85                               |
| 3       | 7                         | 3000 mg/kg bw | 49.6 $\pm$ 12.6                               |
| 4       | 12                        | 6000 mg/kg bw | 43.6 $\pm$ 5.61                               |

Values represent the mean  $\pm$  SD. One-way ANOVA, post hoc Dunnett's, and Tukey's tests were performed ( $p \leq 0.05$ ).

**Table S8.** Chronic progressive nephropathy grade measured after three months of daily MSG administration in two-year-old rats (bw – body weight).

| Group   | No. of subjects/<br>group | MSG dose      | CPN grade<br>(Mean $\pm$ standard deviation) |
|---------|---------------------------|---------------|----------------------------------------------|
| Control | 12                        | Non-consumer  | 2.25 $\pm$ 2.05                              |
| 1       | 10                        | 185 mg/kg bw  | 2.50 $\pm$ 2.27                              |
| 2       | 9                         | 1500 mg/kg bw | 2.67 $\pm$ 2.50                              |
| 3       | 7                         | 3000 mg/kg bw | 3.57 $\pm$ 2.37                              |
| 4       | 12                        | 6000 mg/kg bw | 3.42 $\pm$ 2.61                              |

Values represent the mean  $\pm$  SD. One-way ANOVA, post hoc Dunnett's, and Tukey's tests were performed ( $p \leq 0.05$ ).
